# Supplementary material for: Electrophoretically deposited artificial cathode electrolyte interphase for improved performance of NMC622 at high voltage operation
Source: Royal Society of Chemistry journal article supplement (doi:10.1039/d4lf00319e), 2024-11-21
Supplement: d4lf00319e1.pdf [file d4lf00319e1.pdf]

## **Supporting Information**

# **Electrophoretically deposited artificial cathode electrolyte interphase for improved performance of NMC622 at high voltage operation**

Inbar Anconina and Diana Golodnitsky

*School of Chemistry, Tel Aviv University, Tel Aviv 6997801, Israel*

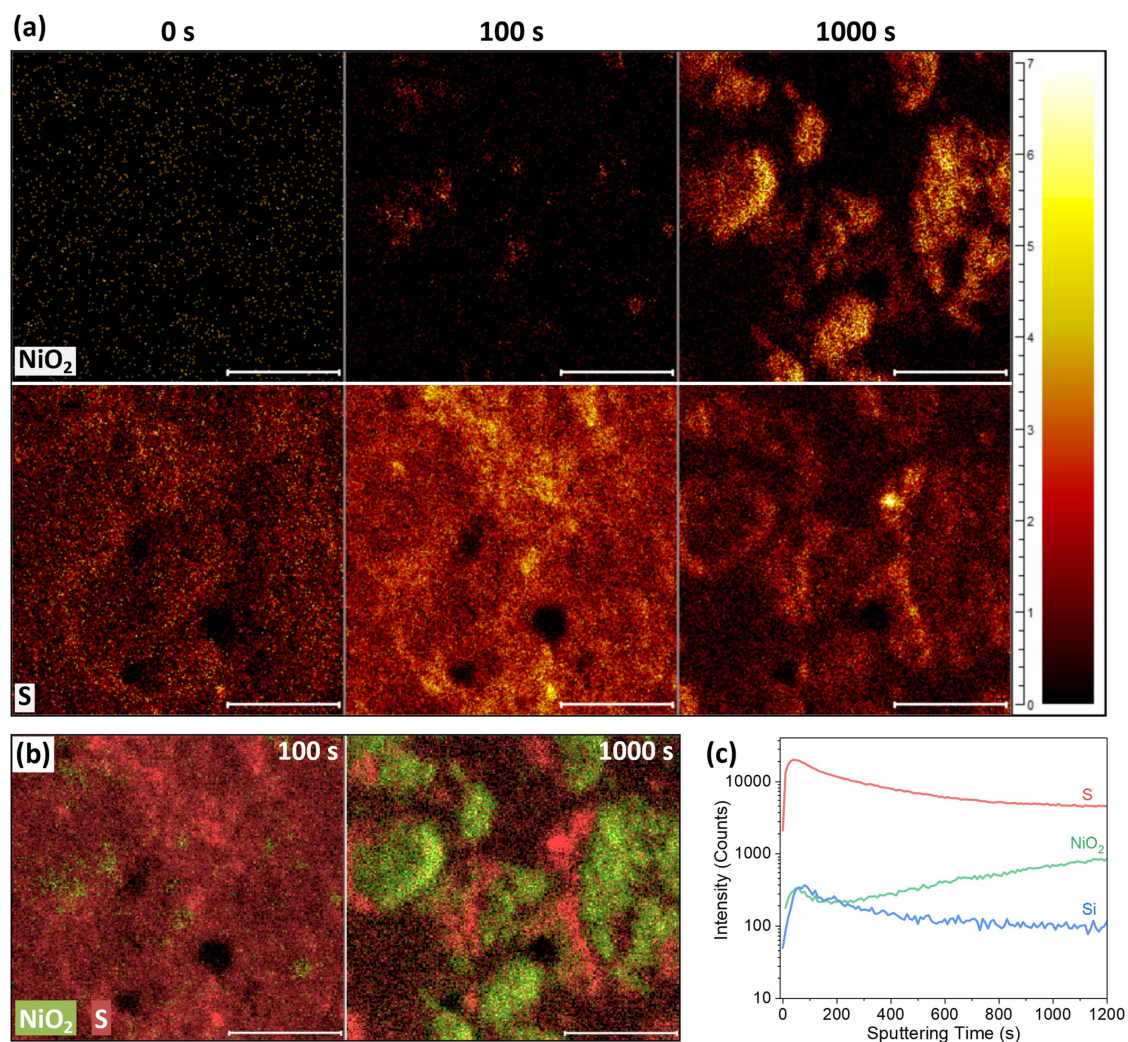

**Fig. S1** Negative TOF-SIMS mapping images of the LPSC-coated NMC622 (scale bar: 10  $\mu\text{m}$ ), display the individual mapping signals for  $\text{NiO}_2$  and S at different sputtering times: 0, 100, and 100 seconds (a); and their merged images for sputtering times of 100 and 1000 seconds (b). (c) The depth profiles of  $\text{NiO}_2$ , S, and Si, indicating the presence of the NMC cathode, LPSC, and PIL polymer, respectively.

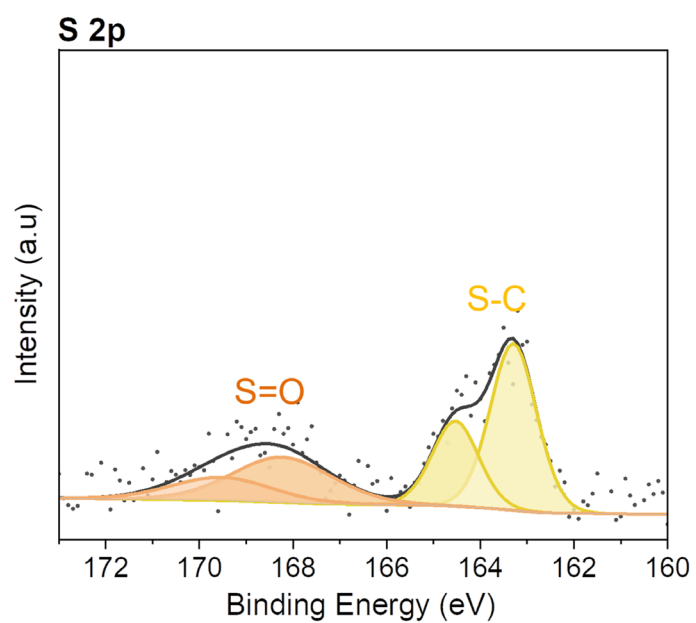

**Fig. S2** S 2p XPS spectrum of pristine PIL (PDMS-g-MPA·Li<sup>+</sup><sub>13</sub>/PEGMEMA<sub>27</sub>).

**Table S1** Summary of the electrochemical performance during first and second charge-discharge cycle of NMC622 cathodes versus Li electrodes at 30 °C and cycling rate of C/15.

| NMC622/Li                  | Charge capacity<br>[mA/g] | Discharge<br>capacity [mA/g] | Coulombic<br>Efficiency<br>[%] | ICL<br>[%] |
|----------------------------|---------------------------|------------------------------|--------------------------------|------------|
| <b>4.3V cutoff voltage</b> |                           |                              |                                |            |
| First cycle                |                           |                              |                                |            |
| Pristine                   | 206.8                     | 190.8                        | 92.3                           | 7.7        |
| LPSC-coated                | 218.8                     | 199.2                        | 91.0                           | 9.0        |
| Second cycle               |                           |                              |                                |            |
| Pristine                   | 191.2                     | 190.9                        | 99.8                           | 0.16       |
| LPSC-coated                | 200.4                     | 199.8                        | 99.7                           | 0.30       |
| <b>4.5V cutoff voltage</b> |                           |                              |                                |            |
| First cycle                |                           |                              |                                |            |
| Pristine                   | 233.8                     | 215.2                        | 92.0                           | 7.9        |
| LPSC-coated                | 248.0                     | 228.0                        | 91.9                           | 8.1        |
| Second cycle               |                           |                              |                                |            |
| Pristine                   | 216.7                     | 215.4                        | 99.4                           | 0.60       |
| LPSC-coated                | 230.6                     | 229.2                        | 99.4                           | 0.61       |

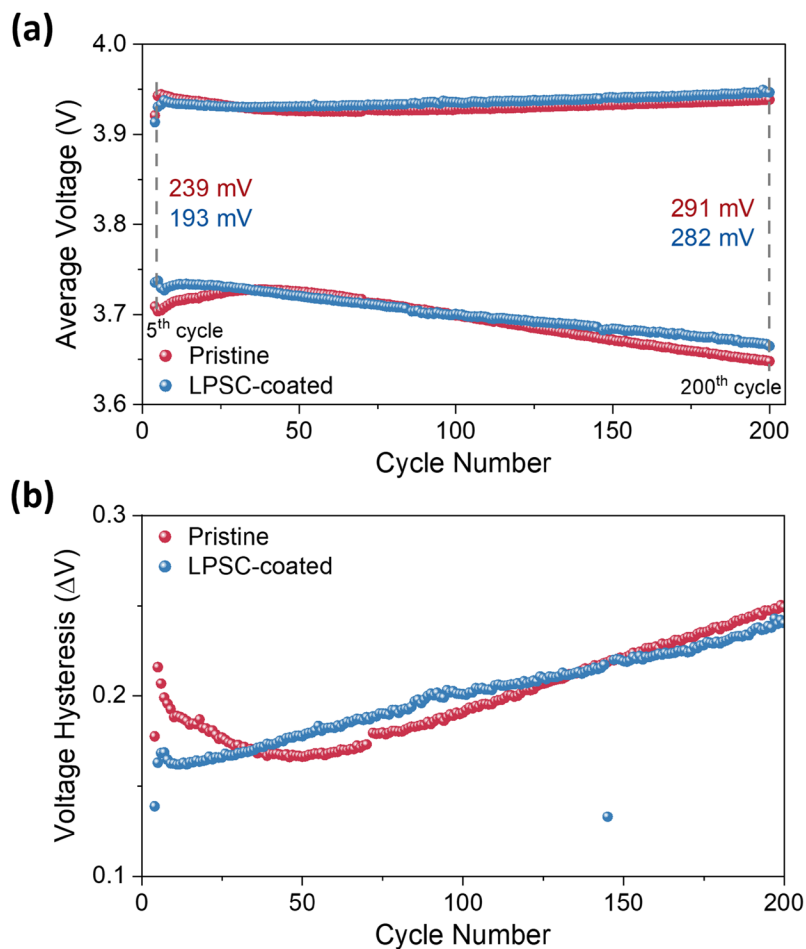

**Fig. S3** (a) Average voltage profiles in charge and discharge and (b) voltage hysteresis calculated as the difference between average charge and discharge voltages for the pristine and LPSC-coated NMC622 cathodes at 4.3V cutoff voltage.

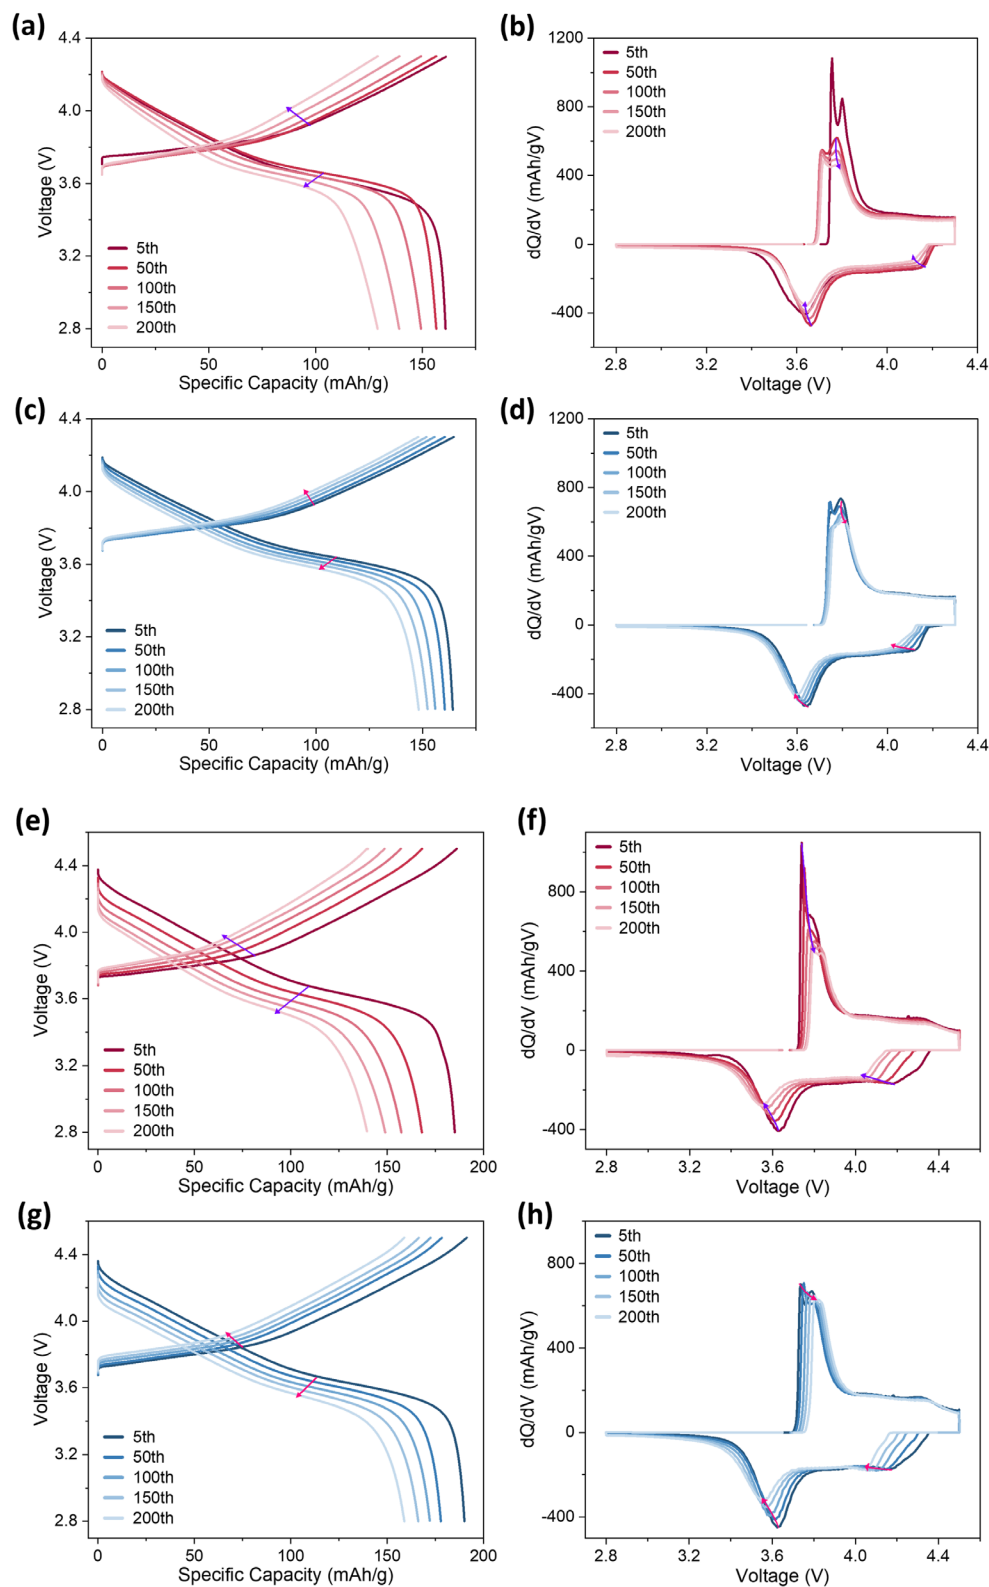

**Fig. S4** Voltage profiles and corresponding differential capacity  $dQ/dV$  versus  $V$  plots for NMC622 cathodes comprising: (a,b)&(e,f) pristine, and (c,d)&(g,h) LPSC-coated, at the 5th, 50th, 100th, 150th, and 200th cycle, at 2.8-4.3 V (a-d) and 2.8-4.5 V (e-h) (0.5C-1.0 charge-discharge rates).

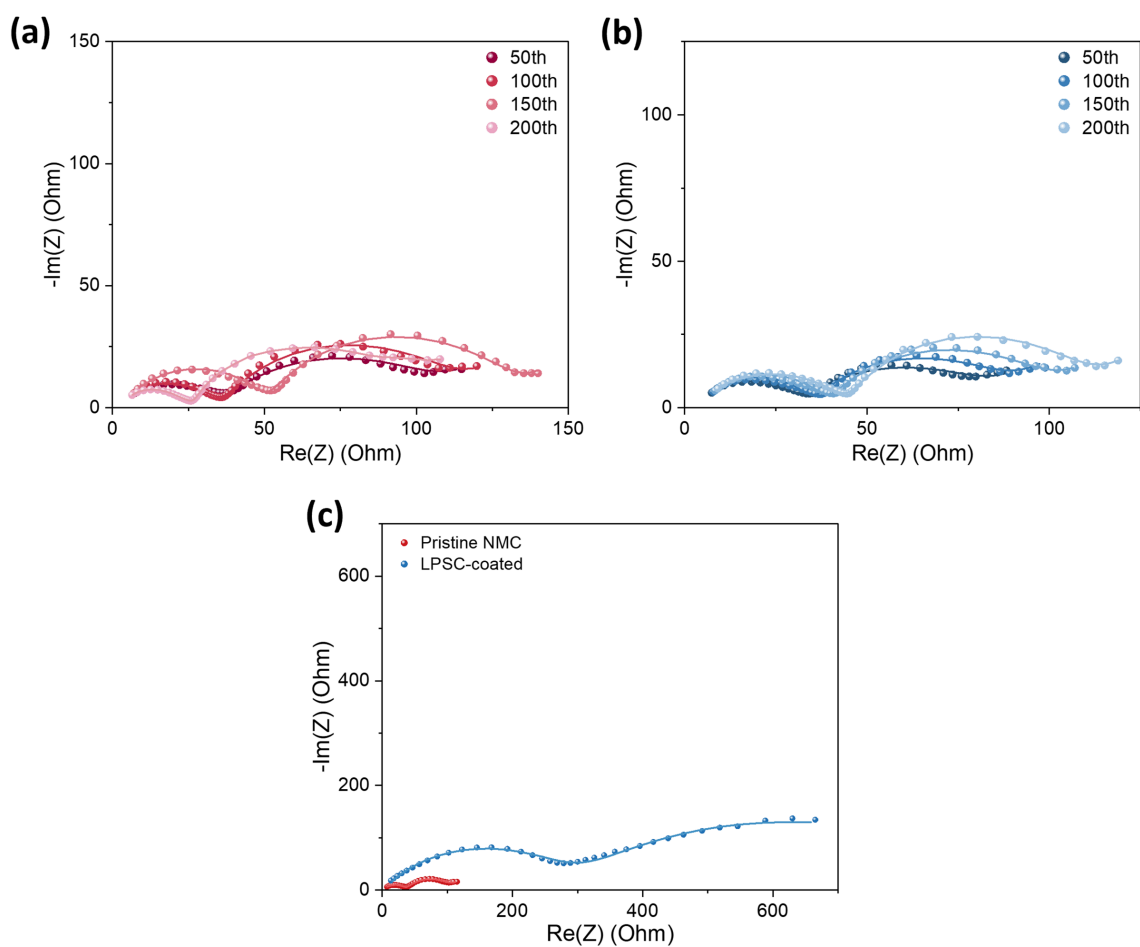

**Fig. S5** Nyquist plots of EIS measurements and their fit during electrochemical cycling after the 50th, 100th, 150th, and 200th cycle at 2.8V-4.5V of pristine (a) and LPSC-coated (b) cells; and comparison of the measurements of the third cycle (c).

**Table S2** Fitted impedance values by the corresponding equivalent circuits of pristine and LPSC-coated NMC622 cathodes and the corresponding estimated lithium-ion diffusion coefficients ( $D_{Li}$ ).

| Cycle number       | $R_1=R_{bulk}$<br>[Ohm] | $R_2=R_{SF}$<br>[Ohm] | $C_2=C_{SF}$<br>[F] | $R_3=R_{CT}$<br>[Ohm] | $C_3=C_{CT}$<br>[F] | $W$<br>[Ohm.s <sup>0.5</sup> ] | $\chi^2$<br>[Ohm <sup>2</sup> ] | $\chi^2/[Z^2]$ | $D_{Li}$<br>[cm <sup>2</sup> .s <sup>-1</sup> ] |
|--------------------|-------------------------|-----------------------|---------------------|-----------------------|---------------------|--------------------------------|---------------------------------|----------------|-------------------------------------------------|
| Pristine NMC622    |                         |                       |                     |                       |                     |                                |                                 |                |                                                 |
| 3rd                | 1.1                     | 36.2                  | 3.12E-6             | 66.5                  | 5.40E-3             | 2.68                           | 15.3                            | 8.12E-3        | 2.464E-14                                       |
| 50th               | 1.3                     | 34.1                  | 2.85E-6             | 71.8                  | 5.40E-3             | 2.52                           | 1.42                            | 5.20E-3        | 2.767E-14                                       |
| 100th              | 1.5                     | 37.7                  | 1.89E-6             | 75.2                  | 7.60E-3             | 2.57                           | 3.03                            | 3.92E-3        | 2.673E-14                                       |
| 150th              | 3.6                     | 47.1                  | 3.94E-6             | 79.5                  | 4.38E-3             | 2.82                           | 1.55                            | 3.40E-3        | 2.212E-14                                       |
| 200th              | 1.1                     | 24.0                  | 2.30E-6             | 66.1                  | 2.30E-3             | 4.22                           | 5.32                            | 4.24E-3        | 9.888E-15                                       |
| LPSC-coated NMC622 |                         |                       |                     |                       |                     |                                |                                 |                |                                                 |
| 3rd                | 1.5                     | 284.5                 | 3.94E-6             | 551.8                 | 11.98E-3            | 5.75                           | 349                             | 8.34E-3        | 5.354E-15                                       |
| 50th               | 2.1                     | 28.6                  | 2.93E-6             | 52.9                  | 5.55E-3             | 1.98                           | 3.79                            | 6.14E-3        | 4.478E-14                                       |
| 100th              | 5.1                     | 29.3                  | 4.21E-6             | 53.0                  | 6.03E-3             | 2.19                           | 5.90                            | 7.60E-3        | 3.675E-14                                       |
| 150th              | 5.1                     | 33.8                  | 3.87E-6             | 60.4                  | 6.88E-3             | 2.36                           | 6.71                            | 8.06E-3        | 3.178E-14                                       |
| 200th              | 2.5                     | 42.4                  | 2.85E-6             | 63.0                  | 7.53E-3             | 3.04                           | 8.16                            | 6.64E-3        | 1.911E-14                                       |



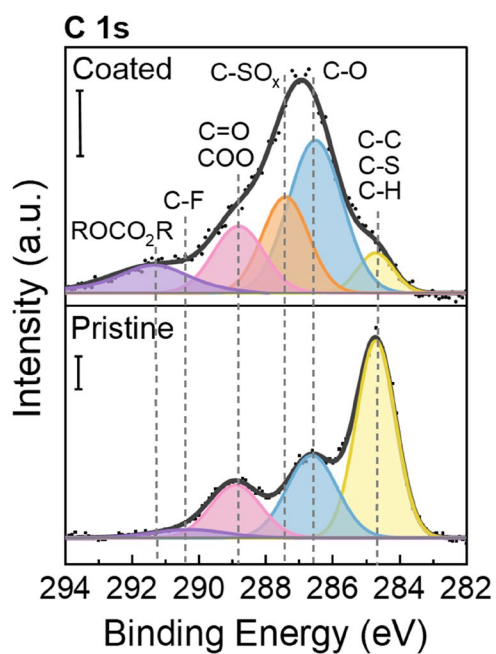

**Fig. S6** C 1s XPS spectra in the CEI of pristine and LPSC-coated NMC622 after 20 cycles (200 s sputtering).

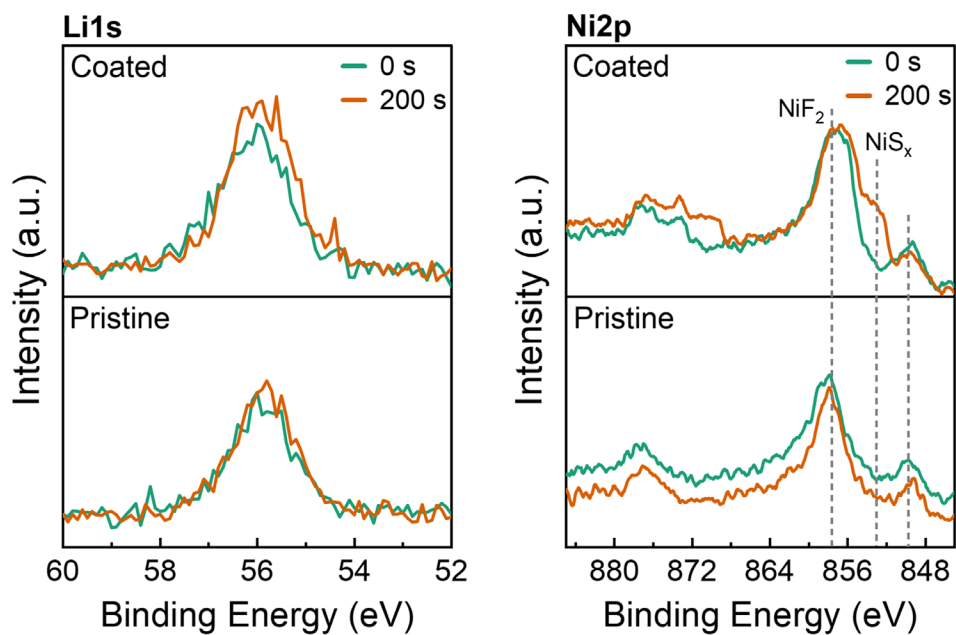

**Fig. S7** Li 1s and Ni 2p XPS spectra of the SEI of Li metal anodes in pristine and LPSC-coated NMC622 cells after 20 cycles (surface and depth profiles after a 200 s sputtering).

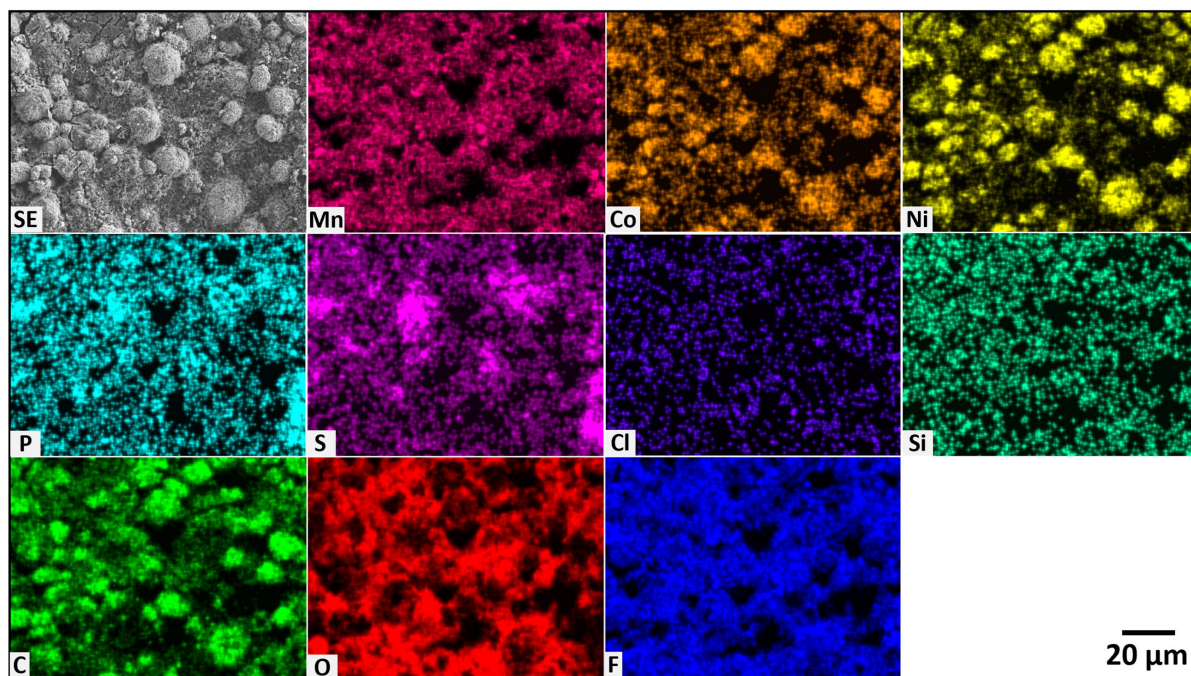

**Fig. S8** SEM and EDS mapping images of cycled LPSC-coated NMC622 (after 200 cycles).
